# Supplementary material for: Lipidomic Profiling of Murine Macrophages Treated with Fatty Acids of Varying Chain Length and Saturation Status
Source: MDPI journal article supplement (doi:10.3390/metabo8020029), 2018-04-23
Supplement: s1 [file s1]

**Supplementary table 3: Conditions for tandem mass spectrometry analysis of lipid species.**

| Lipid class/subclass                | Parent Ion                        | Fragmentation*                  | Internal standard      | Internal standard (pmol) | Collision Energy (V) |
|-------------------------------------|-----------------------------------|---------------------------------|------------------------|--------------------------|----------------------|
| Sphingosine                         | [M+H] <sup>+</sup>                | NL, 18.0 Da                     | Sph(d17:1)             | 50                       | 8                    |
| Sphingosine-1-phosphate             | [M+H] <sup>+</sup>                | Sphingoid specific <sup>^</sup> | Sph(d17:1)             | 50                       | 11-16                |
| Dihydroceramide                     | [M+H] <sup>+</sup>                | Sphingoid specific <sup>^</sup> | dhCer(d18:0/8:0)       | 50                       | 31                   |
| Ceramide                            | [M+H] <sup>+</sup>                | Sphingoid specific <sup>^</sup> | Cer(d18:1/17:0)        | 100                      | 23-29                |
| Monohexosylceramide                 | [M+H] <sup>+</sup>                | Sphingoid specific <sup>^</sup> | HexCer (d18:1/16:0) d3 | 50                       | 33                   |
| Dihexosylceramide                   | [M+H] <sup>+</sup>                | Sphingoid specific <sup>^</sup> | Hex2Cer(d18:1/16:0) d3 | 50                       | 53                   |
| Trihexosylceramide                  | [M+H] <sup>+</sup>                | PI, m/z 264.3                   | Hex3Cer(d18:1/17:0)    | 50                       | 57                   |
| GM3 ganglioside                     | [M+H] <sup>+</sup>                | Sphingoid specific <sup>^</sup> | Hex3Cer(d18:1/17:0)    | 50                       | 57                   |
| GM1 ganglioside                     | [M+2H] <sup>2+</sup>              | PI, m/z 366.2                   | Hex3Cer(d18:1/17:0)    | 50                       | 9                    |
| Sulfatide                           | [M+H] <sup>+</sup>                | PI, m/z 264.3                   | Sulfatide(d18:1/12:0)  | 50                       | 56                   |
| Ceramide-1-phosphate                | [M+H] <sup>+</sup>                | PI, m/z 264.3                   | Cer(d18:1/17:0)        | 50                       | 29                   |
| Sphingomyelin                       | [M+H] <sup>+</sup>                | PI, m/z 184.1                   | SM(d18:1/12:0)         | 200                      | 25                   |
| Phosphatidylcholine                 | [M+H] <sup>+</sup>                | PI, m/z 184.1                   | PC(13:0/13:0)          | 100                      | 21                   |
| Alkylphosphatidylcholine            | [M+H] <sup>+</sup>                | PI, m/z 184.1                   | PC(13:0/13:0)          | 100                      | 21                   |
| Alkenylphosphatidylcholine          | [M+H] <sup>+</sup>                | PI, m/z 184.1                   | PC(13:0/13:0)          | 100                      | 21                   |
| Lysophosphatidylcholine             | [M+H] <sup>+</sup>                | PI, m/z 184.1 & m/z 104.1       | LPC(13:0)              | 100                      | 21                   |
| Lysoalkylphosphatidylcholine        | [M+H] <sup>+</sup>                | PI, m/z 104.1                   | LPC(13:0)              | 100                      | 21                   |
| Lysoalkenylphosphatidylcholine      | [M+H] <sup>+</sup>                | PI, m/z 104.1                   | LPC(13:0)              | 100                      | 21                   |
| Phosphatidylethanolamine            | [M+H] <sup>+</sup>                | NL, 141.0 Da                    | PE(17:0/17:0)          | 100                      | 17                   |
| Alkylphosphatidylethanolamine       | [M+H] <sup>+</sup>                | NL, 141.0 Da                    | PE(17:0/17:0)          | 100                      | 17                   |
| Alkenylphosphatidylethanolamine     | [M+H] <sup>+</sup>                | Acyl specific                   | PE(17:0/17:0)          | 100                      | 17                   |
| Lysophosphatidylethanolamine        | [M+H] <sup>+</sup>                | NL, 141.0 Da                    | PE(17:0/17:0)          | 100                      | 17                   |
| Lysoalkenylphosphatidylethanolamine | [M+H] <sup>+</sup>                | NL, 171.9 Da                    | PE(17:0/17:0)          | 100                      | 19                   |
| Phosphatidylinositol                | [M+NH <sub>4</sub> ] <sup>+</sup> | NL, 277.0 Da                    | PE(17:0/17:0)          | 100                      | 17                   |
| Lysophosphatidylinositol            | [M+NH <sub>4</sub> ] <sup>+</sup> | NL, 277.0 Da                    | LPI(13:0)              | 100                      | 17                   |
| Phosphatidylserine                  | [M+H] <sup>+</sup>                | NL, 185.0 Da                    | PS(17:0/17:0)          | 100                      | 25                   |
| Phosphatidylglycerol                | [M+NH <sub>4</sub> ] <sup>+</sup> | NL, 189.0 Da                    | PG(17:0/17:0)          | 100                      | 21                   |
| Free cholesterol                    | [M+NH <sub>4</sub> ] <sup>+</sup> | PI, m/z 369.3                   | COH d7                 | 10000                    | 23                   |
| Cholesteryl ester                   | [M+NH <sub>4</sub> ] <sup>+</sup> | PI, m/z 369.3                   | CE(18:0) d6            | 1000                     | 10                   |
| Other sterol ester derivative       | [M+NH <sub>4</sub> ] <sup>+</sup> | PI, m/z 367.3                   | CE(18:0) d6            | 1000                     | 12                   |
| Acylcarnitines                      | [M+H] <sup>+</sup>                | PI, m/z 85.1                    | LPC(13:0)              | 100                      | 30                   |
| Diacylglycerol                      | [M+NH <sub>4</sub> ] <sup>+</sup> | NL, fatty acid                  | DG(15:0/15:0)          | 200                      | 21                   |
| Triacylglycerol                     | [M+NH <sub>4</sub> ] <sup>+</sup> | NL, fatty acid                  | TG(17:0/17:0/17:0)     | 100                      | 21                   |
| Alkyltriacylglycerol                | [M+NH <sub>4</sub> ] <sup>+</sup> | NL, fatty acid                  | TG(17:0/17:0/17:0)     | 100                      | 21                   |
| Ubiquinone                          | [M+NH <sub>4</sub> ] <sup>+</sup> | PI, m/z 197.0                   | Hex3Cer(d18:1/17:0)    | 50                       | 17                   |

\* PI, product ion; NL, neutral loss <sup>^</sup> d18:1 base, 264.3. d18:2 base, 262.3, d16:1 base, 236.1, d17:1 base, 250.3, d20:1 base, 292.3, d20:2 base, 290.3.
